# Supplementary material
Source: ML conference proceedings conference paper supplement (https://openaccess.thecvf.com/content/WACV2021/html/Moreira_Fast_Pose_Graph_WACV_2021_paper.html)
Supplement: Supplementary file 1 [file Moreira_Fast_Pose_Graph_WACV_2021_supplemental.zip]

Archive with 2 entries (2 files):
- 1140_MAKS_3Dreconstruction.mp4
- 1140_supplementary.pdf
