# Supplementary material
Source: ML conference proceedings conference paper supplement (https://openaccess.thecvf.com/content/WACV2021/html/Moreira_Fast_Pose_Graph_WACV_2021_paper.html)
Supplement: Supplementary file 1 [file Moreira_Fast_Pose_Graph_WACV_2021_supplemental.zip › 1140_supplementary.pdf]

# Supplementary Material to

## Fast Pose Graph Optimization via Krylov-Schur and Cholesky Factorization

Gabriel Moreira    Manuel Marques    João Paulo Costeira  
 Institute for Systems and Robotics, Instituto Superior Técnico  
 Av. Rovisco Pais, Lisboa, Portugal  
 {gmoreira, manuel, jpc}@isr.tecnico.ulisboa.pt

This document provides additional derivations and benchmarks for the paper *Fast Pose Graph Optimization via Krylov-Schur and Cholesky Factorization*.

### 1 High SNR hypothesis

The log-likelihood function we put forward,

$$f_{\text{ML}} = -\frac{1}{2\sigma_t^2} \sum_{(i,j) \in E} \|\tilde{t}_{ij} - t_i + \mathbf{R}_i \mathbf{R}_j^\top t_j\|^2 + \frac{1}{\sigma_R^2} \sum_{(i,j) \in E} \text{tr}(\tilde{\mathbf{R}}_{ij} \mathbf{R}_j \mathbf{R}_i^\top), \quad (1)$$

is in general not separable in the translation and rotation terms. Notwithstanding, provided there is a high Signal-to-Noise Ratio (SNR), an approximate optimum can be obtained by maximizing first the second term on the right side of (1), which is a function of the rotations only, and then using these rotation estimates to compute the approximate optimal translations. In order to show that this is a reasonable approximation we start by rewriting the log-likelihood as a sum of two functions  $\psi$  and  $\zeta$ . The goal is to group together in  $\zeta$  all the rotations as follows.

$$\begin{aligned} f_{\text{ML}} &= -\frac{1}{2\sigma_t^2} \sum_{(i,j) \in E} \|\tilde{t}_{ij} - t_i + \mathbf{R}_i \mathbf{R}_j^\top t_j\|^2 + \frac{1}{\sigma_R^2} \sum_{(i,j) \in E} \text{tr}(\tilde{\mathbf{R}}_{ij} \mathbf{R}_j \mathbf{R}_i^\top) \\ &= \underbrace{\psi(t) - \frac{1}{\sigma_t^2} \sum_{(i,j) \in E} (\tilde{t}_{ij} - t_i)^\top \mathbf{R}_i \mathbf{R}_j^\top t_j + \frac{1}{\sigma_R^2} \sum_{(i,j) \in E} \text{tr}(\tilde{\mathbf{R}}_{ij} \mathbf{R}_j \mathbf{R}_i^\top)}_{\zeta(\mathbf{R}, t)}. \end{aligned} \quad (2)$$

Let  $t^*$  and  $\mathbf{R}^*$  denote the set of translations and rotations, respectively, that maximize  $f_{\text{ML}}$ . If we have relative pose measurements with a high SNR, we can expect

$$\forall (i, j) \in E : \tilde{t}_{ij} \approx t_i^* - \tilde{\mathbf{R}}_{ij} t_j^* \quad (3)$$

to be a valid approximation. From (3), we can replace  $\tilde{t}_{ij} - t_i^*$  in (2) and rearrange the rotations in the trace of the rightmost term to obtain

$$\zeta(\mathbf{R}, t^*) \approx \frac{1}{\sigma_t^2} \sum_{(i,j) \in E} \text{tr}(t_j^* t_j^{*\top} \tilde{\mathbf{R}}_{ij}^\top \mathbf{R}_i \mathbf{R}_j^\top) + \frac{1}{\sigma_R^2} \sum_{(i,j) \in E} \text{tr}(\tilde{\mathbf{R}}_{ij}^\top \mathbf{R}_i \mathbf{R}_j^\top). \quad (4)$$

The matrix  $t_j^* t_j^{*\top}$  is symmetric and rank-one. Consequently, under the high SNR hypothesis in (3), the optimization problem

$$\arg \max_{\mathbf{R} \in \text{SO}(3)^n} \sum_{(i,j) \in E} \text{tr}(\tilde{\mathbf{R}}_{ij} \mathbf{R}_j \mathbf{R}_i^\top), \quad (5)$$

will yield a good approximation of the set of rotations that maximize  $f_{\text{ML}}$ .

## 2 Comparison between MAKS and Gauss-Newton

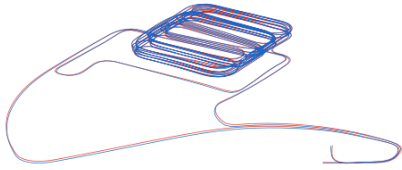

(a) Garage

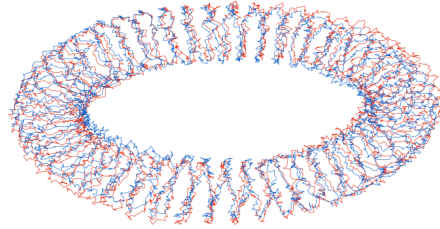

(b) Torus3D

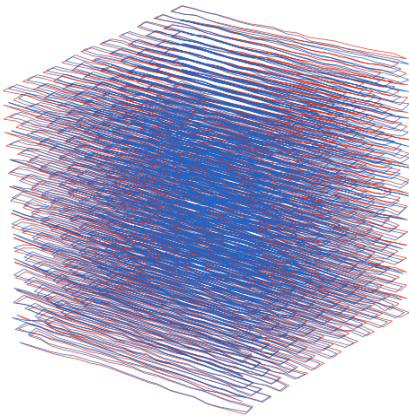

(c) Grid3D

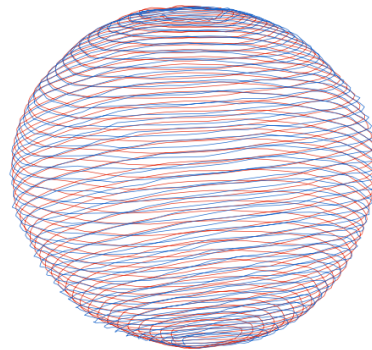

(d) Sphere

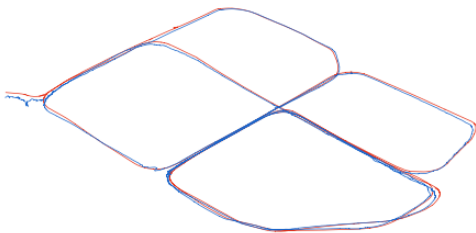

(e) Cubicle

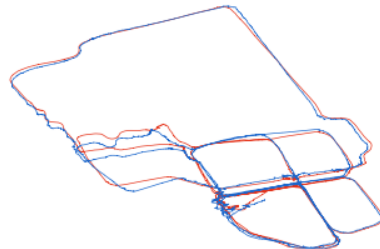

(f) Rim

Figure 1: Trajectory estimates. Comparison between MAKS (blue) and 10 Gauss-Newton iterations using g2o (red) initialized from MAKS for 6 SLAM datasets by Carlone et al.
